# Supplementary material for: Investigating EGF and PAG1 as necroptosis-related biomarkers for diabetic nephropathy: an in silico and in vitro validation study
Source: publisher site journal article supplement (doi:10.18632/aging.205233), 2023-11-20
Supplement: Supplementary file [file aging-v15i22-205233-supplementary-material-SD1.pdf]

## SUPPLEMENTARY TABLE

**Supplementary Table 1. Identification of cell types in scRNA-Seq data via highly variable markers.**

| <b>Cell type</b>                                  | <b>Cluster</b> | <b>Markers</b>          |
|---------------------------------------------------|----------------|-------------------------|
| Collecting duct Type A intercalated (CD-ICA) cell | 1              | SLC26A7, CLNK, ADGRF5   |
| Collecting duct Type B intercalated (CD-ICB) cell | 18             | SLC26A4, SLC4A9, CELF2  |
| Connecting tubule (CT) cell                       | 5,6,10,12,25   | SLC8A1, SNTG1, LSAMP    |
| Distal convoluted tubule (DCT) cell               | 0,8            | SLC12A3, TRPM6, CNNM2   |
| Endothelium (ENDO) cell                           | 13,20          | LDB2, EMCN, MEIS2       |
| Fibroblasts (FIB) cell                            | 23             | C7, NEGR1, TSHZ2, SVEP1 |
| Leukocyte (LEUK) cell                             | 19             | ARHGAP15, PTPRC, PRKCB  |
| Loop of Henle (LOH) cell                          | 3,4,17,21,26   | SLC12A1, PLCB1, RP1     |
| Mesangial (MES) cell                              | 22             | CACNA1C, EBF1, NTRK3    |
| Proximal convoluted tubule (PCT) cell             | 2,7,9,15       | SORCS1, SLC5A12, UGT2B7 |
| Parietal epithelial (PEC) cell                    | 14             | ALDH1A2, CFH, KCNT2     |
| Podocyte (PODO) cell                              | 16             | PTPRQ, PTPRO, PLA2R1    |
| Proximal straight tubule (PST) cell               | 11,24          | ITGB8, VCAM1            |
