# Supplementary material for: Investigating EGF and PAG1 as necroptosis-related biomarkers for diabetic nephropathy: an in silico and in vitro validation study
Source: publisher site journal article supplement (doi:10.18632/aging.205233), 2023-11-20
Supplement: Supplementary file [file aging-v15i22-205233-supplementary-material-SD5.pdf]

**Supplementary Table 5. Available clinical characteristics of DN patients and the healthy control in this study.**

| Baseline characteristics             | GSE96804       |             | GSE142025     |              | Baseline characteristics                | GSE131882     |            |
|--------------------------------------|----------------|-------------|---------------|--------------|-----------------------------------------|---------------|------------|
|                                      | Control (n=20) | DN (n=41)   | Control (n=9) | DN (n=28)    |                                         | Control (n=3) | DN (n=3)   |
| Male/female (% male)                 | 14/6(70)       | 29/12(70.7) | 7/2 (77.7)    | 18/10 (64.2) | Male sex, <i>n</i>                      | 2             | 2          |
| Age (year)                           | 43.2±6.52      | 46.9±7.70   | 60.89±2.85    | 53.18 ±2.47  | Age in years, mean (range)              | 59 (54–62)    | 61(52–74)  |
| Body mass index (kg/m <sup>2</sup> ) | 21.6±2.52      | 24.8±1.82   | 23.38±1.39    | 25.57 ± 0.70 | Glomerulosclerosis                      | none          | mild       |
| Glycated hemoglobin A1c (%)          | 5.21±0.58      | 6.78±1.82   | 5.68±0.29     | 8.455 ± 0.66 | BMI in kg/m <sup>2</sup> , mean (range) | 27 (26–29)    | 35 (22–43) |
| Systolic blood pressure (mm/Hg)      | 123.2±18.2     | 134.2±15.8  | 128.0±1.80    | 141.6 ±4.38  | Terminal serum creatinine, mean, mg/dL  | 0.89          | 1.3        |
| Diastolic blood pressure (mm/Hg)     | 75.3±10.2      | 84.8±8.2    | 75.67±2.26    | 84.41 ± 2.49 | Proteinuria                             | NA            | +          |
| Total urinary protein (g/24hr)       | –              | 2.53±1.20   | 0.09±0.01     | 6.11 ± 0.97  | Hemoglobin A1c, mean, %                 | 5.2           | 8.5        |
| eGFR (ml/min)                        | 100.23±10.5    | 63.16±22.12 | 117.7 ±8.62   | 63.79 ± 5.76 | eGFR, mean mL/minute                    | >60           | >60        |

**Supplementary Table 6. Gene primer sequences.**

| Gene  | Forward primer (5'-3')   | Reverse primer (5'-3')  | bp  |
|-------|--------------------------|-------------------------|-----|
| EGF   | TGTCCACGCAATGTGTCTGAA    | CATTATCGGGTGAGGAACAACC  | 133 |
| PAG1  | TTCCTGTGCTCTAGTTGTGACA   | CACGTTTCATCAGGTTCTCATGG | 75  |
| ZFP36 | GACTGAGCTATGTCGGACCTT    | GAGTTCCTGCTTGTATTTGGGG  | 124 |
| RIP1  | TTACATGGAAAAGGCGTGATAACA | AGGTCTGCGATCTTAATGTGGA  | 86  |
| RIP3  | CATAGGAAGTGGGGCTACGAT    | AATTCGTTATCCAGACTTGCCAT | 95  |
| MLKL  | AGGAGGCTAATGGGGAGATAGA   | TGGCTTGCTGTTAGAAACCTG   | 70  |
| ACTB  | CATGTACGTTGCTATCCAGGC    | CTCCTTAATGTCACGCACGAT   | 188 |
